# Supplementary material
Source: PubMed Central journal article supplement (PMC3206989)
Supplement: NIHMS301531-supplement-01.pdf [file NIHMS301531-supplement-01.pdf]

**Supplementary Table 1.** Linkage associations (LOD scores) of individual Chr 10 markers with ABR thresholds of 245 mice from the (B6.A-Chr10 x B6) x B6.A-Chr10 backcross. Thresholds were obtained for stimulus frequencies of 8, 16, and 32 kHz.

| Chr 10 map position<br>Build 37 |       | ABR threshold |       |        |       |        |       |
|---------------------------------|-------|---------------|-------|--------|-------|--------|-------|
| Marker                          | Mb    | 8 kHz         |       | 16 kHz |       | 32 kHz |       |
|                                 |       | LOD           | var * | LOD    | var * | LOD    | var * |
| <b>6 month test age:</b>        |       |               |       |        |       |        |       |
| <i>D10Mit68</i>                 | 92.4  | 0.61          | 1%    | 3.86   | 7%    | 3.34   | 6%    |
| <i>D10Mit162</i>                | 106.5 | 0.65          | 1%    | 5.64   | 10%   | 5.84   | 10%   |
| <i>D10Mit233</i>                | 113.8 | 0.91          | 2%    | 9.05   | 16%   | 9.59   | 17%   |
| <i>D10Mit14</i>                 | 118.1 | 1.10          | 2%    | 11.32  | 19%   | 11.84  | 20%   |
| <i>D10Mit35a</i>                | 121.6 | 1.00          | 2%    | 12.60  | 21%   | 13.32  | 22%   |
| <i>D10Mit297</i>                | 124.5 | 1.00          | 2%    | 15.84  | 26%   | 16.18  | 26%   |
| <b>9 month test age:</b>        |       |               |       |        |       |        |       |
| <i>D10Mit68</i>                 | 92.4  | 3.41          | 6%    | 8.2    | 15%   | 6.85   | 12%   |
| <i>D10Mit162</i>                | 106.5 | 3.51          | 7%    | 12.84  | 22%   | 13.28  | 23%   |
| <i>D10Mit233</i>                | 113.8 | 3.9           | 7%    | 14.01  | 24%   | 13.47  | 23%   |
| <i>D10Mit14</i>                 | 118.1 | 3.43          | 6%    | 12.84  | 22%   | 12.45  | 21%   |
| <i>D10Mit35a</i>                | 121.6 | 3.73          | 7%    | 13.84  | 23%   | 12.97  | 22%   |
| <i>D10Mit297</i>                | 124.5 | 4.53          | 8%    | 16.51  | 27%   | 14.1   | 24%   |

\* The estimated proportion of the total ABR threshold variation that can be attributed to the influence of a closely linked QTL.
