# Supplementary material
Source: PubMed Central journal article supplement (PMC3206989)
Supplement: NIHMS301531-supplement-02.pdf [file NIHMS301531-supplement-02.pdf]

**Supplementary Table 2.** ABR threshold averages, standard deviations, and standard errors for eight B6.A congenic lines with different A/J-derived segments of Chr 10 compared with the two parental strains from which they were derived. Thresholds are for stimulus frequencies of 8, 16, and 32 kHz. The number (N) of mice tested is shown for each strain-age combination.

| Strain tested                                               | ABR thresholds (dB SPL) |        |        |                  |        |        |
|-------------------------------------------------------------|-------------------------|--------|--------|------------------|--------|--------|
|                                                             | 6 month test age        |        |        | 9 month test age |        |        |
|                                                             | 8 kHz                   | 16 kHz | 32 kHz | 8 kHz            | 16 kHz | 32 kHz |
| <b>Parental strains:</b>                                    |                         |        |        |                  |        |        |
| <b>C57BL/6J</b>                                             |                         | N = 18 |        |                  | N = 23 |        |
| average                                                     | 38.0                    | 21.6   | 77.0   | 45.2             | 30.4   | 83.8   |
| standard deviation                                          | 6.7                     | 8.8    | 13.1   | 9.8              | 14.5   | 6.3    |
| standard error                                              | 1.6                     | 2.1    | 3.1    | 2.0              | 3.0    | 1.3    |
| <b>C57BL/6J-Chr 10<sup>A/J</sup>/NaJ</b>                    |                         | N = 36 |        |                  | N = 7  |        |
| average                                                     | 45.0                    | 52.2   | 89.7   | 61.4             | 64.3   | 91.4   |
| standard deviation                                          | 5.6                     | 18.3   | 12.1   | 13.5             | 17.4   | 13.1   |
| standard error                                              | 0.9                     | 3.1    | 2.0    | 5.1              | 6.6    | 5.0    |
| <b>B6.A congenic lines (extent of A/J derived segment):</b> |                         |        |        |                  |        |        |
| <b>Line 1 (92.4–130 Mb)</b>                                 |                         | N = 17 |        |                  | N = 21 |        |
| average                                                     | 43.5                    | 42.1   | 85.6   | 51.9             | 60.0   | 94.8   |
| standard deviation                                          | 8.2                     | 9.0    | 9.8    | 9.8              | 19.5   | 9.8    |
| standard error                                              | 2.0                     | 2.2    | 2.4    | 2.0              | 4.2    | 2.1    |
| <b>Line 2 (82.1–124.5 Mb)</b>                               |                         | N = 39 |        |                  | N = 33 |        |
| average                                                     | 39.2                    | 25.6   | 70.3   | 45.9             | 43.2   | 83.0   |
| standard deviation                                          | 11.0                    | 12.3   | 9.5    | 8.2              | 23.8   | 15.3   |
| standard error                                              | 1.8                     | 2.0    | 1.5    | 1.4              | 4.1    | 2.7    |
| <b>Line 3 (82.1–121.6 Mb)</b>                               |                         | N = 41 |        |                  | N = 43 |        |
| average                                                     | 38.4                    | 25.7   | 68.7   | 40.7             | 31.9   | 74.9   |
| standard deviation                                          | 8.5                     | 11.8   | 11.6   | 7.0              | 14.4   | 12.6   |
| standard error                                              | 1.3                     | 1.8    | 1.8    | 1.1              | 2.2    | 1.9    |
| <b>Line 4 (82.1–103.5 Mb)</b>                               |                         | N = 34 |        |                  | N = 44 |        |
| average                                                     | 38.2                    | 26.0   | 68.1   | 43.3             | 35.1   | 77.7   |
| standard deviation                                          | 5.9                     | 9.8    | 9.4    | 10.8             | 17.3   | 13.4   |
| standard error                                              | 1.0                     | 1.7    | 1.6    | 1.6              | 2.6    | 2.0    |
| <b>Line 5 (103.5–130 Mb)</b>                                |                         | N = 29 |        |                  | N = 38 |        |
| average                                                     | 44.7                    | 37.1   | 78.4   | 52.2             | 57.1   | 90.4   |
| standard deviation                                          | 7.8                     | 14.0   | 11.7   | 13.0             | 19.6   | 11.5   |
| standard error                                              | 1.3                     | 2.2    | 2.2    | 2.1              | 3.2    | 1.9    |
| <b>Line 6 (103.5–121.6 Mb)</b>                              |                         | N = 22 |        |                  | N = 22 |        |
| average                                                     | 41.6                    | 30.0   | 71.8   | 49.1             | 37.3   | 75.5   |
| standard deviation                                          | 12.6                    | 9.4    | 8.4    | 13.1             | 15.2   | 16.3   |
| standard error                                              | 2.7                     | 2.0    | 1.8    | 2.8              | 3.2    | 3.5    |
| <b>Line 7 (113.8–130 Mb)</b>                                |                         | N = 20 |        |                  | N = 20 |        |
| average                                                     | 50.6                    | 39.8   | 89.2   | 55.5             | 63.5   | 95.5   |
| standard deviation                                          | 14.7                    | 20.7   | 8.6    | 11.9             | 20.7   | 4.6    |
| standard error                                              | 3.3                     | 4.6    | 1.9    | 2.7              | 4.6    | 1.0    |
| <b>Line 8 (124.5–130 Mb)</b>                                |                         | N = 13 |        |                  | N = 11 |        |
| average                                                     | 44.2                    | 37.7   | 83.5   | 60.0             | 65.0   | 95.9   |
| standard deviation                                          | 12.0                    | 11.7   | 6.9    | 15.5             | 15.5   | 5.8    |
| standard error                                              | 3.3                     | 3.2    | 1.9    | 4.7              | 4.7    | 1.7    |
