# Supplementary material
Source: PubMed Central journal article supplement (PMC3206989)
Supplement: NIHMS301531-supplement-05.pdf [file NIHMS301531-supplement-05.pdf]

**Supplementary Table 3.** Evolutionary conservation of the CS histidine mutated in A/J mice. NCBI BLAST results showing the alignment of 40 amino acids from the CS sequences of diverse species. All mammals and most other species examined retain the histidine (H, highlighted in yellow) that is mutated to asparagine (N, highlighted in blue) in A/J mice. The few exceptions are highlighted in gray. The high degree of evolutionary constraint on this amino acid indicates that the H55N mutation is likely to impact protein function.

| species                         | Genbank      | residues | amino acid sequence                                     |
|---------------------------------|--------------|----------|---------------------------------------------------------|
| A/J mice                        |              |          | VLSNLIIPKEQARIKTFKQON <sup>N</sup> GKTVVGQITVDMMYGGMRGM |
| all other mice                  | NP_080720    | 36-75    | VLSNLIIPKEQARIKTFKQOH <sup>H</sup> GKTVVGQITVDMMYGGMRGM |
| rat                             | NP_570111    | 36-75    | ILSNLIIPKEQARVKTFRQOH <sup>H</sup> GKTVVGQITVDMMYGGMRGM |
| dog                             | XP_531634    | 36-75    | ILADLIIPKEQARIKTFRQOH <sup>H</sup> GKTVVGQITVDMMYGGMRGM |
| human                           | NP_004068    | 36-75    | ILADLIIPKEQARIKTFRQOH <sup>H</sup> GKTVVGQITVDMMYGGMRGM |
| pig                             | NP_999441    | 36-75    | ILADLIIPKEQARIKTFRQOH <sup>H</sup> GNTVVGQITVDMMYGGMRGM |
| horse                           | NP_001182444 | 36-75    | ILADLIIPKEQARIKTFRQOH <sup>H</sup> GNTVVGQITVDMMYGGMRGM |
| cow                             | NP_001038186 | 36-75    | ILADLIIPKEQTRVKAFRQOH <sup>H</sup> GKTVVGQITVDMMYGGMRGM |
| <i>Danio rerio</i>              | NP_955892    | 38-77    | VLSDLVPKEQSRIKNFKQOY <sup>Y</sup> GKTSIGQITVDMVYGGMRGV  |
| <i>Xenopus laevis</i>           | NP_001080194 | 38-77    | VLSDLIPKEQTRIKNFKQOH <sup>H</sup> GKTVIGQVTVDMVYGGMRGM  |
| <i>X. tropicalis</i>            | NP_001017313 | 38-77    | VLSDLIPKEQTRIKNFRQOY <sup>Y</sup> GKNVIGQITVDMMYGGMRGM  |
| <i>Drosophila</i> - all species | NP_572319    | 37-76    | VLAAKVPQEQERVKNFRKQH <sup>H</sup> GATKMGETTIDMMYGGMRGI  |
| <i>Anopheles</i>                | XP_320478    | 39-78    | VLTEKIPKEQERVKNFRKQH <sup>H</sup> GNTKVGEVTVDMMYGGMRGI  |
| <i>Aedes aegypti</i>            | XP_001656210 | 38-77    | VLSEKIPKEQERVKNFRKQF <sup>F</sup> GATKVGEVTVDMMYGGMRGI  |
| <i>C. elegans</i>               | NP_499264    | 38-77    | VLSKKIPAHNAKVKSFRTEH <sup>H</sup> GSTVVQNVNIDMIYGGMRSM  |
| <i>Arabidopsis</i>              | NP_566016    | 44-82    | LQELIPEQQDRLKCLKSEH <sup>H</sup> GKVQLGNITVDMVIGGMRGM   |
| <i>Zea mays</i>                 | NP_001149070 | 28-66    | LQELIPEQQDRLKCLKSEH <sup>H</sup> GKTQLGNITVDMVLGGMRGM   |
| <i>Oryza sativa</i>             | NP_001068031 | 44-82    | LQELIPEQQDRLKCLKSEH <sup>H</sup> GKVQLGNITVDMVLGGMRGM   |
| <i>Neurospora</i>               | XP_956898    | 42-80    | FAELLPENIEKIKALRKEH <sup>H</sup> GSKVVDKVTLDQVYGGARGI   |
| <i>Hydra</i>                    | XP_002163668 | 40-78    | LQEIIPKPKKQVADFRKEH <sup>H</sup> ANTKIGEVTVGMVYGGMRSI   |
